# Supplementary material
Source: PubMed Central journal article supplement (PMC4892804)
Supplement: rspb20160625supp2.pdf [file rspb20160625supp2.pdf]

**Electronic supplementary material: table S2**

Temperatures of soil and refuse dump surfaces around nest-mounds and external refuse piles of the le  
Data were obtained from 5 days of summer in Villa El Chocón, Patagonia, Argentina (39 °S); and were  
Temperatures above 49° C are highlighted

Note that periods > 49° C comprise 4-5 hs per day, between 12 and 18 h, with peaks around 65° C

| Date Time        | temp ext |
|------------------|----------|
| 01/01/2008 17:00 | 47.43    |
| 01/01/2008 17:15 | 57.24    |
| 01/01/2008 17:30 | 58.55    |
| 01/01/2008 17:45 | 56.6     |
| 01/01/2008 18:00 | 52.37    |
| 01/01/2008 18:15 | 49.02    |
| 01/01/2008 18:30 | 44.89    |
| 01/01/2008 18:45 | 44.4     |
| 01/01/2008 19:00 | 44.4     |
| 01/01/2008 19:15 | 43.42    |
| 01/01/2008 19:30 | 39.67    |
| 01/01/2008 19:45 | 37       |
| 01/01/2008 20:00 | 34.43    |
| 01/01/2008 20:15 | 32.34    |
| 01/01/2008 20:30 | 30.71    |
| 01/01/2008 20:45 | 29.1     |
| 01/01/2008 21:00 | 27.91    |
| 01/01/2008 21:15 | 27.12    |
| 01/01/2008 21:30 | 26.34    |
| 01/01/2008 21:45 | 25.95    |
| 01/01/2008 22:00 | 25.17    |
| 01/01/2008 22:15 | 24.79    |
| 01/01/2008 22:30 | 24.4     |
| 01/01/2008 22:45 | 23.63    |
| 01/01/2008 23:00 | 23.63    |
| 01/01/2008 23:15 | 23.24    |
| 01/01/2008 23:30 | 22.86    |
| 01/01/2008 23:45 | 22.48    |
| 01/02/2008 00:00 | 22.09    |
| 01/02/2008 00:15 | 21.71    |
| 01/02/2008 00:30 | 21.33    |
| 01/02/2008 00:45 | 20.95    |
| 01/02/2008 01:00 | 20.57    |
| 01/02/2008 01:15 | 20.19    |
| 01/02/2008 01:30 | 20.19    |
| 01/02/2008 01:45 | 19.81    |
| 01/02/2008 02:00 | 19.04    |
| 01/02/2008 02:15 | 19.04    |
| 01/02/2008 02:30 | 18.66    |
| 01/02/2008 02:45 | 18.66    |
| 01/02/2008 03:00 | 18.66    |

|                  |       |
|------------------|-------|
| 01/02/2008 03:15 | 18.28 |
| 01/02/2008 03:30 | 18.28 |
| 01/02/2008 03:45 | 17.9  |
| 01/02/2008 04:00 | 17.9  |
| 01/02/2008 04:15 | 17.52 |
| 01/02/2008 04:30 | 17.52 |
| 01/02/2008 04:45 | 17.52 |
| 01/02/2008 05:00 | 17.52 |
| 01/02/2008 05:15 | 17.14 |
| 01/02/2008 05:30 | 17.14 |
| 01/02/2008 05:45 | 17.14 |
| 01/02/2008 06:00 | 16.76 |
| 01/02/2008 06:15 | 16.76 |
| 01/02/2008 06:30 | 16.76 |
| 01/02/2008 06:45 | 16.76 |
| 01/02/2008 07:00 | 17.14 |
| 01/02/2008 07:15 | 17.52 |
| 01/02/2008 07:30 | 17.9  |
| 01/02/2008 07:45 | 18.66 |
| 01/02/2008 08:00 | 19.81 |
| 01/02/2008 08:15 | 19.81 |
| 01/02/2008 08:30 | 20.19 |
| 01/02/2008 08:45 | 20.95 |
| 01/02/2008 09:00 | 21.71 |
| 01/02/2008 09:15 | 22.09 |
| 01/02/2008 09:30 | 22.86 |
| 01/02/2008 09:45 | 24.01 |
| 01/02/2008 10:00 | 25.17 |
| 01/02/2008 10:15 | 26.73 |
| 01/02/2008 10:30 | 29.5  |
| 01/02/2008 10:45 | 31.93 |
| 01/02/2008 11:00 | 35.7  |
| 01/02/2008 11:15 | 39.22 |
| 01/02/2008 11:30 | 41.52 |
| 01/02/2008 11:45 | 45.89 |
| 01/02/2008 12:00 | 48.49 |
| 01/02/2008 12:15 | 51.79 |
| 01/02/2008 12:30 | 54.13 |
| 01/02/2008 12:45 | 55.97 |
| 01/02/2008 13:00 | 56.6  |
| 01/02/2008 13:15 | 58.55 |
| 01/02/2008 13:30 | 59.22 |
| 01/02/2008 13:45 | 59.9  |
| 01/02/2008 14:00 | 60.59 |
| 01/02/2008 14:15 | 62.57 |
| 01/02/2008 14:30 | 63.78 |
| 01/02/2008 14:45 | 65.00 |

|                  |       |
|------------------|-------|
| 01/02/2008 15:00 | 66.21 |
| 01/02/2008 15:15 | 67.43 |
| 01/02/2008 15:30 | 68.65 |
| 01/02/2008 15:45 | 61.29 |
| 01/02/2008 16:00 | 59.9  |
| 01/02/2008 16:15 | 56.6  |
| 01/02/2008 16:30 | 53.53 |
| 01/02/2008 16:45 | 52.95 |
| 01/02/2008 17:00 | 52.37 |
| 01/02/2008 17:15 | 52.37 |
| 01/02/2008 17:30 | 51.79 |
| 01/02/2008 17:45 | 49.56 |
| 01/02/2008 18:00 | 45.39 |
| 01/02/2008 18:15 | 41.99 |
| 01/02/2008 18:30 | 39.67 |
| 01/02/2008 18:45 | 39.67 |
| 01/02/2008 19:00 | 40.59 |
| 01/02/2008 19:15 | 37.88 |
| 01/02/2008 19:30 | 34.43 |
| 01/02/2008 19:45 | 31.52 |
| 01/02/2008 20:00 | 29.9  |
| 01/02/2008 20:15 | 28.7  |
| 01/02/2008 20:30 | 27.52 |
| 01/02/2008 20:45 | 26.34 |
| 01/02/2008 21:00 | 25.17 |
| 01/02/2008 21:15 | 24.01 |
| 01/02/2008 21:30 | 23.63 |
| 01/02/2008 21:45 | 23.24 |
| 01/02/2008 22:00 | 22.48 |
| 01/02/2008 22:15 | 22.09 |
| 01/02/2008 22:30 | 21.71 |
| 01/02/2008 22:45 | 21.33 |
| 01/02/2008 23:00 | 20.95 |
| 01/02/2008 23:15 | 20.19 |
| 01/02/2008 23:30 | 20.19 |
| 01/02/2008 23:45 | 19.81 |
| 01/03/2008 00:00 | 19.42 |
| 01/03/2008 00:15 | 19.42 |
| 01/03/2008 00:30 | 19.42 |
| 01/03/2008 00:45 | 19.04 |
| 01/03/2008 01:00 | 18.66 |
| 01/03/2008 01:15 | 18.28 |
| 01/03/2008 01:30 | 17.52 |
| 01/03/2008 01:45 | 17.52 |
| 01/03/2008 02:00 | 17.14 |
| 01/03/2008 02:15 | 16.76 |
| 01/03/2008 02:30 | 16.76 |

|                  |       |
|------------------|-------|
| 01/03/2008 02:45 | 16.38 |
| 01/03/2008 03:00 | 16.38 |
| 01/03/2008 03:15 | 16.38 |
| 01/03/2008 03:30 | 16    |
| 01/03/2008 03:45 | 15.62 |
| 01/03/2008 04:00 | 15.23 |
| 01/03/2008 04:15 | 15.23 |
| 01/03/2008 04:30 | 14.85 |
| 01/03/2008 04:45 | 14.85 |
| 01/03/2008 05:00 | 14.47 |
| 01/03/2008 05:15 | 14.09 |
| 01/03/2008 05:30 | 14.09 |
| 01/03/2008 05:45 | 14.09 |
| 01/03/2008 06:00 | 13.7  |
| 01/03/2008 06:15 | 13.32 |
| 01/03/2008 06:30 | 12.93 |
| 01/03/2008 06:45 | 12.93 |
| 01/03/2008 07:00 | 13.32 |
| 01/03/2008 07:15 | 14.09 |
| 01/03/2008 07:30 | 15.62 |
| 01/03/2008 07:45 | 16.76 |
| 01/03/2008 08:00 | 19.04 |
| 01/03/2008 08:15 | 17.14 |
| 01/03/2008 08:30 | 16.38 |
| 01/03/2008 08:45 | 17.14 |
| 01/03/2008 09:00 | 17.9  |
| 01/03/2008 09:15 | 18.28 |
| 01/03/2008 09:30 | 19.04 |
| 01/03/2008 09:45 | 20.19 |
| 01/03/2008 10:00 | 22.09 |
| 01/03/2008 10:15 | 23.63 |
| 01/03/2008 10:30 | 26.34 |
| 01/03/2008 10:45 | 29.5  |
| 01/03/2008 11:00 | 33.17 |
| 01/03/2008 11:15 | 36.57 |
| 01/03/2008 11:30 | 40.59 |
| 01/03/2008 11:45 | 44.4  |
| 01/03/2008 12:00 | 47.96 |
| 01/03/2008 12:15 | 50.66 |
| 01/03/2008 12:30 | 53.53 |
| 01/03/2008 12:45 | 54.74 |
| 01/03/2008 13:00 | 55.97 |
| 01/03/2008 13:15 | 57.89 |
| 01/03/2008 13:30 | 57.89 |
| 01/03/2008 13:45 | 56.6  |
| 01/03/2008 14:00 | 59.22 |
| 01/03/2008 14:15 | 61.29 |

|                  |       |
|------------------|-------|
| 01/03/2008 14:30 | 62.01 |
| 01/03/2008 14:45 | 61.29 |
| 01/03/2008 15:00 | 60.59 |
| 01/03/2008 15:15 | 59.9  |
| 01/03/2008 15:30 | 59.9  |
| 01/03/2008 15:45 | 61.29 |
| 01/03/2008 16:00 | 62.01 |
| 01/03/2008 16:15 | 62.01 |
| 01/03/2008 16:30 | 59.22 |
| 01/03/2008 16:45 | 57.89 |
| 01/03/2008 17:00 | 57.24 |
| 01/03/2008 17:15 | 57.24 |
| 01/03/2008 17:30 | 57.24 |
| 01/03/2008 17:45 | 54.74 |
| 01/03/2008 18:00 | 51.22 |
| 01/03/2008 18:15 | 45.39 |
| 01/03/2008 18:30 | 41.99 |
| 01/03/2008 18:45 | 42.46 |
| 01/03/2008 19:00 | 43.91 |
| 01/03/2008 19:15 | 42.94 |
| 01/03/2008 19:30 | 40.59 |
| 01/03/2008 19:45 | 37.88 |
| 01/03/2008 20:00 | 34.85 |
| 01/03/2008 20:15 | 31.93 |
| 01/03/2008 20:30 | 29.9  |
| 01/03/2008 20:45 | 27.52 |
| 01/03/2008 21:00 | 25.17 |
| 01/03/2008 21:15 | 22.86 |
| 01/03/2008 21:30 | 21.33 |
| 01/03/2008 21:45 | 21.71 |
| 01/03/2008 22:00 | 22.09 |
| 01/03/2008 22:15 | 22.09 |
| 01/03/2008 22:30 | 21.71 |
| 01/03/2008 22:45 | 21.71 |
| 01/03/2008 23:00 | 21.33 |
| 01/03/2008 23:15 | 21.33 |
| 01/03/2008 23:30 | 21.33 |
| 01/03/2008 23:45 | 20.95 |
| 01/04/2008 00:00 | 20.57 |
| 01/04/2008 00:15 | 20.57 |
| 01/04/2008 00:30 | 20.19 |
| 01/04/2008 00:45 | 20.19 |
| 01/04/2008 01:00 | 19.81 |
| 01/04/2008 01:15 | 19.42 |
| 01/04/2008 01:30 | 19.42 |
| 01/04/2008 01:45 | 19.42 |
| 01/04/2008 02:00 | 19.42 |

|                  |       |
|------------------|-------|
| 01/04/2008 02:15 | 19.04 |
| 01/04/2008 02:30 | 18.66 |
| 01/04/2008 02:45 | 18.66 |
| 01/04/2008 03:00 | 18.28 |
| 01/04/2008 03:15 | 17.9  |
| 01/04/2008 03:30 | 17.9  |
| 01/04/2008 03:45 | 17.52 |
| 01/04/2008 04:00 | 17.14 |
| 01/04/2008 04:15 | 17.14 |
| 01/04/2008 04:30 | 16.76 |
| 01/04/2008 04:45 | 16.38 |
| 01/04/2008 05:00 | 16.38 |
| 01/04/2008 05:15 | 16    |
| 01/04/2008 05:30 | 16    |
| 01/04/2008 05:45 | 16    |
| 01/04/2008 06:00 | 16    |
| 01/04/2008 06:15 | 16    |
| 01/04/2008 06:30 | 16    |
| 01/04/2008 06:45 | 16    |
| 01/04/2008 07:00 | 16.76 |
| 01/04/2008 07:15 | 17.52 |
| 01/04/2008 07:30 | 18.66 |
| 01/04/2008 07:45 | 20.19 |
| 01/04/2008 08:00 | 22.48 |
| 01/04/2008 08:15 | 21.71 |
| 01/04/2008 08:30 | 21.33 |
| 01/04/2008 08:45 | 22.09 |
| 01/04/2008 09:00 | 23.24 |
| 01/04/2008 09:15 | 23.63 |
| 01/04/2008 09:30 | 24.79 |
| 01/04/2008 09:45 | 26.34 |
| 01/04/2008 10:00 | 27.91 |
| 01/04/2008 10:15 | 29.9  |
| 01/04/2008 10:30 | 32.34 |
| 01/04/2008 10:45 | 34.85 |
| 01/04/2008 11:00 | 37.88 |
| 01/04/2008 11:15 | 41.05 |
| 01/04/2008 11:30 | 44.89 |
| 01/04/2008 11:45 | 48.49 |
| 01/04/2008 12:00 | 50.66 |
| 01/04/2008 12:15 | 53.53 |
| 01/04/2008 12:30 | 55.35 |
| 01/04/2008 12:45 | 56.6  |
| 01/04/2008 13:00 | 57.24 |
| 01/04/2008 13:15 | 58.55 |
| 01/04/2008 13:30 | 59.22 |
| 01/04/2008 13:45 | 59.22 |

|                  |       |
|------------------|-------|
| 01/04/2008 14:00 | 59.9  |
| 01/04/2008 14:15 | 60.59 |
| 01/04/2008 14:30 | 62.01 |
| 01/04/2008 14:45 | 62.74 |
| 01/04/2008 15:00 | 62.74 |
| 01/04/2008 15:15 | 63.48 |
| 01/04/2008 15:30 | 63.48 |
| 01/04/2008 15:45 | 62.74 |
| 01/04/2008 16:00 | 62.74 |
| 01/04/2008 16:15 | 62.74 |
| 01/04/2008 16:30 | 62.01 |
| 01/04/2008 16:45 | 61.29 |
| 01/04/2008 17:00 | 59.9  |
| 01/04/2008 17:15 | 58.55 |
| 01/04/2008 17:30 | 57.89 |
| 01/04/2008 17:45 | 56.6  |
| 01/04/2008 18:00 | 52.95 |
| 01/04/2008 18:15 | 49.02 |
| 01/04/2008 18:30 | 46.4  |
| 01/04/2008 18:45 | 44.89 |
| 01/04/2008 19:00 | 46.4  |
| 01/04/2008 19:15 | 45.89 |
| 01/04/2008 19:30 | 43.42 |
| 01/04/2008 19:45 | 41.05 |
| 01/04/2008 20:00 | 37.88 |
| 01/04/2008 20:15 | 35.7  |
| 01/04/2008 20:30 | 34.01 |
| 01/04/2008 20:45 | 32.76 |
| 01/04/2008 21:00 | 31.52 |
| 01/04/2008 21:15 | 30.31 |
| 01/04/2008 21:30 | 28.7  |
| 01/04/2008 21:45 | 27.52 |
| 01/04/2008 22:00 | 26.34 |
| 01/04/2008 22:15 | 25.95 |
| 01/04/2008 22:30 | 25.56 |
| 01/04/2008 22:45 | 25.56 |
| 01/04/2008 23:00 | 25.17 |
| 01/04/2008 23:15 | 25.17 |
| 01/04/2008 23:30 | 25.17 |
| 01/04/2008 23:45 | 25.17 |
| 01/05/2008 00:00 | 24.79 |
| 01/05/2008 00:15 | 24.4  |
| 01/05/2008 00:30 | 24.79 |
| 01/05/2008 00:45 | 24.4  |
| 01/05/2008 01:00 | 24.4  |
| 01/05/2008 01:15 | 24.01 |
| 01/05/2008 01:30 | 24.01 |

|                  |       |
|------------------|-------|
| 01/05/2008 01:45 | 23.63 |
| 01/05/2008 02:00 | 23.63 |
| 01/05/2008 02:15 | 23.63 |
| 01/05/2008 02:30 | 23.24 |
| 01/05/2008 02:45 | 23.24 |
| 01/05/2008 03:00 | 22.86 |
| 01/05/2008 03:15 | 22.86 |
| 01/05/2008 03:30 | 21.71 |
| 01/05/2008 03:45 | 21.71 |
| 01/05/2008 04:00 | 21.33 |
| 01/05/2008 04:15 | 20.57 |
| 01/05/2008 04:30 | 19.81 |
| 01/05/2008 04:45 | 19.42 |
| 01/05/2008 05:00 | 19.04 |
| 01/05/2008 05:15 | 19.04 |
| 01/05/2008 05:30 | 18.66 |
| 01/05/2008 05:45 | 18.28 |
| 01/05/2008 06:00 | 18.66 |
| 01/05/2008 06:15 | 19.42 |
| 01/05/2008 06:30 | 19.81 |
| 01/05/2008 06:45 | 20.19 |
| 01/05/2008 07:00 | 20.57 |
| 01/05/2008 07:15 | 20.95 |
| 01/05/2008 07:30 | 21.71 |
| 01/05/2008 07:45 | 23.24 |
| 01/05/2008 08:00 | 25.17 |
| 01/05/2008 08:15 | 24.01 |
| 01/05/2008 08:30 | 23.63 |
| 01/05/2008 08:45 | 24.01 |
| 01/05/2008 09:00 | 25.17 |
| 01/05/2008 09:15 | 25.56 |
| 01/05/2008 09:30 | 26.34 |
| 01/05/2008 09:45 | 27.12 |
| 01/05/2008 10:00 | 28.7  |
| 01/05/2008 10:15 | 31.12 |
| 01/05/2008 10:30 | 34.01 |
| 01/05/2008 10:45 | 37.44 |
| 01/05/2008 11:00 | 41.05 |
| 01/05/2008 11:15 | 44.89 |
| 01/05/2008 11:30 | 48.49 |
| 01/05/2008 11:45 | 51.79 |
| 01/05/2008 12:00 | 55.35 |
| 01/05/2008 12:15 | 57.89 |
| 01/05/2008 12:30 | 59.9  |
| 01/05/2008 12:45 | 60.59 |
| 01/05/2008 13:00 | 60.59 |
| 01/05/2008 13:15 | 62.01 |



|                  |       |
|------------------|-------|
| 01/05/2008 13:30 | 64.24 |
| 01/05/2008 13:45 | 66.6  |
| 01/05/2008 14:00 | 66.6  |
| 01/05/2008 14:15 | 68.25 |
| 01/05/2008 14:30 | 67.42 |
| 01/05/2008 14:45 | 67.42 |
| 01/05/2008 15:00 | 69.11 |
| 01/05/2008 15:15 | 69.11 |

leaf-cutting ant *Acromyrmex lobicornis*  
measured by HOBOS thermocouples
